# Supplementary material for: The Impact of Transplant Recipient and Donor Organ Type 2 Diabetes Polygenic Risk Scores on the Development of Early Post-Transplant Diabetes
Source: Research Square preprint supplement (doi:10.21203/rs.3.rs-798458/v1), 2021-08-17
Supplement: Supplementary file 1 [file efe70720a3bd55488f8bd496.docx]

**SUPPLEMENTARY INFORMATION**

Supplementary Table 1. T2D-PRS association with pre-transplant DM for individual cohorts (multivariate analysis)

| Supplementary Table 2. Under the scenario of treating liver transplant recipients in higher risk categories Q4/Q5 | | | | | | | |
| --- | --- | --- | --- | --- | --- | --- | --- |
| Number of recipients in each Q | Weighted Transplant Donor-Recipient T2D PRS quintiles | | | | | | |
| PTDM | Q1 | Q2 | Q3 | Q4 | Q5 | Total | PTDM incidence |
| No | 196 | 181 | 160 | 154 | 144 | 835 |  |
| Yes (no treatment) | 37 | 52 | 71 | **78** | **89** | 327 | 28.1% |
| PTDM = Yes after treatment of Q4-5 recipients (60% effective) | 37 | 52 | 71 | **31.2** | **35.6** | 226.8 | **19.5%** |
| PTDM = Yes after treatment of Q4-5 recipients (30% effective) | 37 | 52 | 71 | **54.6** | **62.3** | 276.9 | **23.8%** |
| Total | 233 | 233 | 231 | 232 | 233 | 1162 |  |

**Genotyping data quality control:** Extensive quality control (QC) was performed on SNP genotypes according to community standards. Samples with a genotype missing rate >3% were removed. Next, a set of high-quality autosomal variants (genotyping rate >99%, minor allele frequency >5%, Hardy-Weinberg Equilibrium (HWE) P value >0.001, pairwise linkage disequilibrium (LD) r2 between variants < 0.2 located outside regions known for long-range LD) were selected to calculate relatedness between individuals, heterozygosity, and principal components (PCs). Relatedness between samples was estimated based on identity by descent (IBD). Samples with very high heterozygosity and suspected contamination, as well as sex-mismatches, were removed from further analysis. Unrelated samples with pairwise IBD >0.3 in genetically more heterogeneous US cohorts and >0.1 in majority European descent Leuven cohort were excluded from the study.

**Imputation of ungenotyped SNPs:** Ungenotyped SNPs were imputed using 1000 Genomes Project (1KGP) phase 3 genotypes (1,2) and Genome of the Netherlands (GoNL) version5 genotypes (3) as reference panels for both phasing and imputation. Genotypes were phased using SHAPEIT (4) and imputed with IMPUTE2 (5). SNPs with imputation info score > 0.8, minor allele frequency >0.001, and Hardy-Weinberg Equilibrium (HWE) P value >1E-6 were qualified to be included to calculate T2D-PRS. In total, 361, 361, 326, and 355 SNPs in Baylor, BioTIP, DeKAF, and Leuven cohorts, respectively, overlapped with the top 403 T2D-associated independent signals and were included in the calculation of T2D-PRS using PRSice2 (6).

**Power consideration to detect effect of donor T2D-PRS on PTDM in DeKAF cohort:** Assuming the same effect size from donor-PRS seen in liver cohort (R=1.18), PTDM incidence rate of 6% in DeKAF, and current DeKAF sample size (533 D-R pairs), we have limited power (13%) at alpha=0.05 to detect such association. Our null observation of kidney donor genetic contribution to PTDM would require to be confirmed in other kidney cohorts with larger sample sizes, or with higher PTDM incidence.

References for supplementary information:

1. 1000 Genomes Project Consortium, Auton A, Brooks LD, et al. A global reference for human genetic variation. Nature. 2015;526(7571):68–74.
2. Sudmant PH, Rausch T, Gardner EJ, et al; 1000 Genomes Project Consortium. An integrated map of structural variation in 2,504 human genomes. Nature. 2015;526(7571):75–81.
3. Genome of the Netherlands Consortium. Whole-genome sequence variation, population structure and demographic history of the Dutch population. Nat Genet. 2014;46(8):818–825.
4. Delaneau O, Marchini J, Zagury JF. A linear complexity phasing method for thousands of genomes. Nat Methods. 2011 Dec 4;9(2):179-81.
5. B. N. Howie, P. Donnelly, and J. Marchini (2009) A flexible and accurate genotype imputation method for the next generation of genome-wide association studies. PLoS Genetics 5(6): e1000529
6. Choi SW, Mak TS, O'Reilly PF. Tutorial: a guide to performing polygenic risk score analyses. Nat Protoc. Sep 2020;15(9):2759-2772.
